# Supplementary material
Source: PubMed Central journal article supplement (PMC2040901)
Supplement: pnas_0611393104_5.pdf [file pnas_0611393104_5.pdf]

**Table 3.** Markers genotyped in the study. Contig positions are with reference to NT\_025741.13. P - values for the mixed-model ANOVA test the alternative hypothesis of different trait means for each genotype against the null hypothesis that the genotype means are equal. Markers without P - values reported for the 2nd panel have been genotyped only in the 1st panel. There was no evidence ( $P > 0.05$ ) of population stratification with a between-family variance-components test.

| Chromosome position | Contig position | Internal ID | dbSNP ID   | ANOVA p-values |           |
|---------------------|-----------------|-------------|------------|----------------|-----------|
|                     |                 |             |            | 1st panel      | 2nd panel |
| 135329106           | 39391842        | -           | rs9402669  | 6.8E-01        |           |
| 135349178           | 39411914        | -           | rs4376364  | 4.6E-01        |           |
| 135364022           | 39426758        | -           | rs9373120  | 5.4E-01        |           |
| 135392072           | 39454808        | -           | rs987690   | 2.6E-03        |           |
| 135396811           | 39459547        | -           | rs4896130  | 7.3E-03        | 2.5E-01   |
| 135400260           | 39462996        | -           | rs7742542  | 2.8E-03        | 3.8E-01   |
| 135401739           | 39464475        | -           | rs9376084  | 4.6E-01        | 7.7E-03   |
| 135407511           | 39470247        | -           | rs6569990  | 3.7E-03        | 2.4E-01   |
| 135410907           | 39473643        | -           | rs6915770  | 4.1E-03        | 3.2E-01   |
| 135411606           | 39474342        | -           | rs11755229 | 7.6E-03        | 2.0E-01   |
| 135414769           | 39477505        | -           | rs1041480  | 6.2E-03        | 3.7E-01   |
| 135417455           | 39480191        | -           | rs2297338  | 4.0E-03        | 3.3E-01   |
| 135417684           | 39480420        | C29955341   | rs2297339  | 3.6E-01        |           |
| 135417685           | 39480421        | C29955342   | rs52090900 | 4.0E-07        |           |
| 135417751           | 39480487        | C29955343   | rs2297340  | 3.3E-03        |           |
| 135417902           | 39480638        | C29955344   | rs52090901 | 5.8E-05        | 2.3E-03   |
| 135417925           | 39480661        | C29955345   | rs52090902 | 2.6E-03        | 2.4E-01   |
| 135418072           | 39480808        | C29953465   | rs52090903 | 3.8E-03        | 2.2E-01   |
| 135418102           | 39480838        | C29955337   | rs9389262  | 4.6E-03        | 3.4E-01   |
| 135418168           | 39480904        | C29953466   | rs13208043 | 1.2E-01        | 8.1E-01   |
| 135418784           | 39481520        | C29953468   | rs2183709  | 5.3E-03        | 2.9E-01   |
| 135418879           | 39481615        | C29953469   | rs4142299  | 4.5E-03        | 1.9E-01   |
| 135420841           | 39483577        | C29953745   | rs11154791 | 4.5E-04        | 6.1E-04   |
| 135422941           | 39485677        | C29953471   | rs11759062 | 1.5E-04        | 7.5E-04   |
| 135423044           | 39485780        | C29953472   | rs11759077 | 2.4E-04        | 5.4E-04   |
| 135424673           | 39487409        | -           | rs6904897  | 2.0E-05        | 2.0E-04   |
| 135425482           | 39488218        | C29953474   | rs11758774 | 1.1E-04        | 7.5E-04   |
| 135432529           | 39495265        | C29953462   | rs1547247  | 1.2E-14        |           |
| 135437241           | 39499977        | C29953463   | rs13220662 | 2.8E-11        | 4.1E-09   |
| 135443064           | 39505800        | C29953464   | rs52090904 | 4.1E-08        | 2.0E-08   |
| 135446815           | 39509551        | C29953534   | rs1331308  | 4.4E-05        |           |
| 135447052           | 39509788        | C29953535   | rs949895   | 9.4E-05        |           |
| 135450809           | 39513545        | -           | rs6913541  | 2.6E-03        |           |
| 135452921           | 39515657        | C29953538   | rs9376090  | 7.9E-36        | 3.8E-40   |
| 135453430           | 39516166        | C29953539   | rs9389266  | 1.3E-03        |           |
| 135454075           | 39516811        | C29953540   | rs52090905 | 4.0E-09        | 9.9E-08   |
| 135454329           | 39517065        | C29953541   | rs52090906 | 4.8E-09        |           |
| 135455762           | 39518498        | C29953542   | rs52090907 | 1.8E-09        |           |
| 135460711           | 39523447        | C29954334   | rs9399137  | 4.5E-38        | 3.8E-40   |
| 135460947           | 39523683        | C29953510   | rs52090908 | 6.4E-06        |           |
| 135460998           | 39523734        | C29953511   | rs9402684  | 2.4E-04        |           |
| 135461381           | 39524117        | C29953514   | rs9402685  | 9.4E-32        | 2.7E-37   |
| 135461527           | 39524263        | C29953515   | rs7743042  | 1.2E-04        |           |
| 135463989           | 39526725        | C29953517   | rs11759553 | 7.6E-39        | 5.4E-37   |

| Chromosome position | Contig position | Internal ID | dbSNP ID   | ANOVA p-values |           |
|---------------------|-----------------|-------------|------------|----------------|-----------|
|                     |                 |             |            | 1st panel      | 2nd panel |
| 135465105           | 39527841        | C29953519   | rs1074849  | 7.3E-12        |           |
| 135465872           | 39528608        | C29953520   | rs52090909 | 4.9E-38        | 1.2E-37   |
| 135465896           | 39528632        | C29953521   | rs6930223  | 1.1E-05        |           |
| 135468251           | 39530987        | C29953523   | rs4895440  | 4.1E-39        | 1.0E-35   |
| 135468266           | 39531002        | C29953524   | rs4895441  | 2.2E-38        | 2.8E-36   |
| 135468837           | 39531573        | C29953525   | rs9376092  | 2.1E-38        | 3.0E-36   |
| 135468852           | 39531588        | C29953526   | rs9389269  | 1.1E-38        | 2.0E-35   |
| 135469510           | 39532246        | C29953527   | rs9402686  | 1.7E-38        | 5.1E-36   |
| 135471786           | 39534522        | C29954343   | rs10484494 | 2.4E-08        | 4.4E-05   |
| 135473333           | 39536069        | C29953581   | rs11154792 | 1.4E-35        | 3.6E-31   |
| 135473754           | 39536490        | C29953582   | rs1411919  | 8.3E-12        | 1.4E-15   |
| 135474576           | 39537312        | C29953583   | rs7766963  | 4.3E-03        |           |
| 135476864           | 39539600        | -           | rs2223385  | 3.9E-12        | 5.2E-16   |
| 135477194           | 39539930        | C29953585   | rs9483788  | 6.6E-29        | 4.0E-24   |
| 135479079           | 39541815        | C29953586   | rs1320959  | 2.8E-11        |           |
| 135480316           | 39543052        | C29953589   | rs52090910 | 1.4E-07        | 9.2E-06   |
| 135480956           | 39543692        | C29953590   | rs2026937  | 1.0E-02        | 2.0E-01   |
| 135484218           | 39546954        | C29953593   | rs9483791  | 2.3E-11        | 1.5E-14   |
| 135484905           | 39547641        | -           | rs1320963  | 5.3E-12        | 6.3E-14   |
| 135485702           | 39548438        | C29953595   | rs2026938  | 1.3E-10        | 4.2E-14   |
| 135487141           | 39549877        | C29953596   | rs9376093  | 6.8E-12        | 1.8E-15   |
| 135487507           | 39550243        | C29953597   | rs9376094  | 4.1E-11        | 5.3E-15   |
| 135488534           | 39551270        | C29953599   | rs9399139  | 1.3E-01        | 5.4E-01   |
| 135489466           | 39552202        | C29953600   | rs9321485  | 3.4E-10        | 1.1E-13   |
| 135489513           | 39552249        | C29953601   | rs9321486  | 5.2E-12        | 1.5E-14   |
| 135491008           | 39553744        | C29953602   | rs9494149  | 1.5E-10        | 1.9E-14   |
| 135492448           | 39555184        | C29953604   | rs9376095  | 2.7E-10        | 3.3E-14   |
| 135492890           | 39555626        | C29953607   | rs1041478  | 3.7E-01        | 5.5E-01   |
| 135493257           | 39555993        | C29953608   | rs6934903  | 5.2E-23        | 2.0E-18   |
| 135493273           | 39556009        | C29953609   | rs1569534  | 1.5E-11        | 1.4E-13   |
| 135495720           | 39558456        | C29953611   | rs6929404  | 5.4E-12        | 1.1E-13   |
| 135497022           | 39559758        | C29953614   | rs9385716  | 3.5E-11        | 3.7E-13   |
| 135499234           | 39561970        | C29953662   | rs1883354  | 5.9E-01        | 2.8E-01   |
| 135509418           | 39572154        | C29953684   | rs6929368  | 4.4E-01        | 3.9E-01   |
| 135509698           | 39572434        | -           | rs9494154  | 2.4E-17        | 6.2E-16   |
| 135510584           | 39573320        | C29953685   | rs9494155  | 4.1E-01        | 7.3E-01   |
| 135519030           | 39581766        | -           | rs7765438  | 4.5E-01        | 3.3E-01   |
| 135524512           | 39587248        | C29953689   | rs6922541  | 3.9E-01        |           |
| 135542466           | 39605202        | C29350526   | rs6938173  | 8.5E-08        | 4.2E-08   |
| 135543234           | 39605970        | Bpil        |            | 1.0E-08        | 8.7E-07   |
| 135545478           | 39608214        | -           | rs210962   | 4.5E-07        | 1.1E-08   |
| 135549087           | 39611823        | C29336484   | rs6922903  | 8.9E-07        |           |
| 135556251           | 39618987        | C17988439   | rs210798   | 2.1E-02        |           |
| 135556526           | 39619262        | C29942363   | rs52090911 | 1.5E-03        |           |
| 135559307           | 39622043        | C29942346   | rs12663543 | 1.1E-06        | 3.7E-09   |
| 135559689           | 39622425        | C29942347   | rs12660713 | 1.9E-05        |           |
| 135561193           | 39623929        | C29334569   | rs6920829  | 1.4E-05        | 1.5E-07   |
| 135564050           | 39626786        | C29942366   | rs52090912 | 2.7E-08        | 1.1E-08   |
| 135564375           | 39627111        | C29380834   | rs7757388  | 5.5E-01        |           |

| Chromosome position | Contig position | Internal ID | dbSNP ID   | ANOVA p-values |           |
|---------------------|-----------------|-------------|------------|----------------|-----------|
|                     |                 |             |            | 1st panel      | 2nd panel |
| 135564448           | 39627184        | C18118072   | rs3752383  | 2.8E-08        |           |
| 135564632           | 39627368        | C18015056   | rs743589   | 1.4E-08        | 5.3E-09   |
| 135565479           | 39628215        | C29942351   | rs52090913 | 2.5E-08        |           |
| 135566209           | 39628945        | C29942352   | rs9385719  | 1.5E-08        | 3.6E-09   |
| 135566246           | 39628982        | C29942355   | rs9402696  | 2.8E-08        |           |
| 135567089           | 39629825        | C18122181   | rs3819409  | 2.4E-08        | 4.0E-09   |
| 135567430           | 39630166        | C18122182   | rs3819410  | 8.5E-09        |           |
| 135567620           | 39630356        | C29942356   | rs9389278  | 1.2E-08        |           |
| 135571254           | 39633990        | C29942357   | rs12203816 | 9.4E-09        | 7.2E-09   |
| 135573144           | 39635880        | C17988503   | rs210950   | 8.3E-09        | 2.6E-09   |
| 135573332           | 39636068        | C17988502   | rs210949   | 2.3E-06        |           |
| 135573493           | 39636229        | C17988501   | rs210948   | 1.9E-01        |           |
| 135576711           | 39639447        | C17988497   | rs210944   | 1.2E-01        |           |
| 135577140           | 39639876        | C17988495   | rs210942   | 8.8E-07        | 6.8E-07   |
| 135577714           | 39640450        | C29348821   | rs6936293  | 1.2E-07        |           |
| 135578189           | 39640925        | C17988494   | rs210941   | 1.8E-01        |           |
| 135578886           | 39641622        | C29362372   | rs7738267  | 1.4E-07        | 2.7E-10   |
| 135580285           | 39643021        | C18076714   | rs2179308  | 4.5E-01        |           |
| 135580332           | 39643068        | C18028011   | rs1013891  | 4.5E-05        | 1.1E-03   |
| 135581089           | 39643825        | C18117295   | rs3216774  | 4.4E-02        | 1.0E+00   |
| 135625991           | 39688727        | -           | rs2050018  | 8.3E-01        |           |
| 135650130           | 39712866        | -           | rs6904233  | 9.1E-01        |           |
| 135658325           | 39721061        | -           | rs2142956  | 9.0E-01        |           |
| 135714977           | 39777713        | -           | rs2746429  | 6.3E-01        |           |
| 135794506           | 39857242        | -           | rs2757640  | 9.7E-01        |           |
| 135818171           | 39880907        | -           | rs2614267  | 9.5E-01        |           |
| 135827866           | 39890602        | -           | rs2614281  | 2.1E-01        |           |
| 135859828           | 39922564        | -           | rs6928455  | 9.6E-01        |           |
