# Supplementary material
Source: PubMed Central journal article supplement (PMC2040901)
Supplement: pnas_0611393104_6.pdf [file pnas_0611393104_6.pdf]

**Table 4.** Positions, genotype counts, and P - values for the mixed-model ANOVA tests of association for markers within the three trait-associated blocks. Markers forming the trait-associated blocks are indicated in bold. Results are also shown for markers interspersed with these. Some markers appear twice in the table because block 2 and block 3 overlap. Genotype counts include both members of each twin pair. The global P - value is calculated by comparing the null hypothesis of equal genotype means to the alternative of unconstrained genotype means. Dominance was evaluated when three genotype classes were observed. The additive (per-allele) substitution effect contrasting the reference and alternative alleles at each marker are shown (beta & s.e.).

| Chromosome position | Marker            | Ref      | Alt      | Genotypes 1st panel |     |     | Association 1st panel |         | Additive effect 1st panel |         | Genotypes 2nd panel |     |     | Association 2nd panel |         | Additive effect 2nd panel |         |
|---------------------|-------------------|----------|----------|---------------------|-----|-----|-----------------------|---------|---------------------------|---------|---------------------|-----|-----|-----------------------|---------|---------------------------|---------|
|                     |                   | Allele R | Allele A | R/R                 | R/A | A/A | Global                | Dom     | beta                      | s.e.    | R/R                 | R/A | A/A | Global                | Dom     | beta                      | s.e.    |
| <b>BLOCK1</b>       |                   |          |          |                     |     |     |                       |         |                           |         |                     |     |     |                       |         |                           |         |
| 135417902           | <b>rs52090901</b> | T        | G        | 244                 | 322 | 115 | 5.8E-05               | 8.9E-01 | 1.4E-01                   | 3.2E-02 | 424                 | 533 | 183 | 2.3E-03               | 4.7E-01 | 1.0E-01                   | 3.0E-02 |
| 135417925           | rs52090902        | C        | T        | 163                 | 327 | 191 | 2.6E-03               | 6.5E-01 | 1.1E-01                   | 3.1E-02 | 258                 | 603 | 298 | 2.4E-01               | 8.4E-01 | 4.8E-02                   | 2.9E-02 |
| 135418072           | rs52090903        | T        | G        | 164                 | 326 | 190 | 3.8E-03               | 7.4E-01 | 1.0E-01                   | 3.1E-02 | 263                 | 593 | 301 | 2.2E-01               | 8.9E-01 | 4.9E-02                   | 2.8E-02 |
| 135418102           | rs9389262         | G        | T        | 165                 | 326 | 189 | 4.6E-03               | 8.9E-01 | 1.0E-01                   | 3.1E-02 | 254                 | 593 | 290 | 3.4E-01               | 6.5E-01 | 4.1E-02                   | 2.9E-02 |
| 135418168           | rs13208043        | T        | C        | 606                 | 65  | 5   | 1.2E-01               | 6.9E-01 | -9.1E-02                  | 1.2E-01 | 1055                | 104 | 4   | 8.1E-01               | 5.4E-01 | 6.6E-02                   | 1.5E-01 |
| 135418784           | rs2183709         | C        | T        | 169                 | 320 | 199 | 5.3E-03               | 1.0E+00 | 9.9E-02                   | 3.1E-02 | 259                 | 602 | 296 | 2.9E-01               | 1.0E+00 | 4.5E-02                   | 2.9E-02 |
| 135418879           | rs4142299         | G        | T        | 170                 | 328 | 195 | 4.5E-03               | 1.0E+00 | 1.0E-01                   | 3.1E-02 | 257                 | 598 | 295 | 1.9E-01               | 8.2E-01 | 5.2E-02                   | 2.9E-02 |
| 135420841           | <b>rs11154791</b> | A        | G        | 249                 | 319 | 121 | 4.5E-04               | 7.6E-01 | 1.2E-01                   | 3.2E-02 | 422                 | 539 | 188 | 6.1E-04               | 4.9E-01 | 1.1E-01                   | 3.0E-02 |
| 135422941           | <b>rs11759062</b> | A        | C        | 208                 | 269 | 101 | 1.5E-04               | 1.0E+00 | 1.4E-01                   | 3.4E-02 | 423                 | 548 | 183 | 7.5E-04               | 4.4E-01 | 1.1E-01                   | 3.0E-02 |
| 135423044           | <b>rs11759077</b> | A        | G        | 203                 | 280 | 100 | 2.4E-04               | 7.8E-01 | 1.4E-01                   | 3.5E-02 | 430                 | 561 | 185 | 5.4E-04               | 4.0E-01 | 1.2E-01                   | 3.0E-02 |
| 135424673           | <b>rs6904897</b>  | T        | G        | 240                 | 334 | 116 | 2.0E-05               | 4.4E-01 | 1.4E-01                   | 3.3E-02 | 411                 | 540 | 187 | 2.0E-04               | 4.8E-01 | 1.2E-01                   | 3.0E-02 |
| 135425482           | <b>rs11758774</b> | T        | G        | 248                 | 322 | 123 | 1.1E-04               | 6.8E-01 | 1.3E-01                   | 3.2E-02 | 430                 | 562 | 190 | 7.5E-04               | 3.8E-01 | 1.1E-01                   | 3.0E-02 |
| <b>BLOCK 2</b>      |                   |          |          |                     |     |     |                       |         |                           |         |                     |     |     |                       |         |                           |         |
| 135452921           | <b>rs9376090</b>  | T        | C        | 378                 | 286 | 50  | 7.9E-36               | 1.2E-03 | 4.8E-01                   | 3.9E-02 | 596                 | 505 | 85  | 3.8E-40               | 6.6E-02 | 4.4E-01                   | 3.5E-02 |
| 135453430           | rs9389266         | G        | T        | 512                 | 173 | 28  | 1.3E-03               | 3.1E-01 | -1.1E-01                  | 5.4E-02 | -                   | -   | -   | -                     | -       | -                         | -       |
| 135454075           | rs52090905        | C        | T        | 581                 | 120 | 4   | 4.0E-09               | 2.5E-01 | -1.9E-01                  | 1.3E-01 | 947                 | 215 | 13  | 9.9E-08               | 3.5E-01 | -1.9E-01                  | 8.5E-02 |
| 135454329           | rs52090906        | T        | C        | 582                 | 126 | 4   | 4.8E-09               | 2.7E-01 | -1.9E-01                  | 1.3E-01 | -                   | -   | -   | -                     | -       | -                         | -       |
| 135455762           | rs52090907        | C        | G        | 563                 | 121 | 2   | 1.8E-09               | 1.5E-01 | -9.5E-02                  | 1.8E-01 | -                   | -   | -   | -                     | -       | -                         | -       |
| 135460711           | <b>rs9399137</b>  | T        | C        | 363                 | 290 | 51  | 4.5E-38               | 2.7E-04 | 5.0E-01                   | 3.8E-02 | 588                 | 491 | 82  | 3.8E-40               | 3.2E-02 | 4.5E-01                   | 3.5E-02 |
| 135460947           | rs52090908        | T        | C        | 619                 | 72  | 0   | 6.4E-06               | -       | -3.2E-01                  | 7.0E-02 | -                   | -   | -   | -                     | -       | -                         | -       |
| 135460998           | rs9402684         | T        | C        | 152                 | 334 | 200 | 2.4E-04               | 1.0E+00 | 1.3E-01                   | 3.2E-02 | -                   | -   | -   | -                     | -       | -                         | -       |
| 135461381           | <b>rs9402685</b>  | T        | C        | 358                 | 264 | 46  | 9.4E-32               | 2.1E-03 | 4.7E-01                   | 4.0E-02 | 585                 | 493 | 81  | 2.7E-37               | 8.5E-02 | 4.3E-01                   | 3.6E-02 |
| 135461527           | rs7743042         | A        | G        | 155                 | 349 | 197 | 1.2E-04               | 8.6E-01 | 1.3E-01                   | 3.1E-02 | -                   | -   | -   | -                     | -       | -                         | -       |
| 135463989           | <b>rs11759553</b> | A        | T        | 364                 | 298 | 54  | 7.6E-39               | 6.8E-04 | 4.9E-01                   | 3.7E-02 | 600                 | 486 | 88  | 5.4E-37               | 1.3E-01 | 4.2E-01                   | 3.5E-02 |
| 135465105           | rs1074849         | G        | A        | 420                 | 242 | 42  | 7.3E-12               | 5.8E-01 | -2.4E-01                  | 4.4E-02 | -                   | -   | -   | -                     | -       | -                         | -       |
| 135465872           | <b>rs52090909</b> | C        | G        | 360                 | 293 | 52  | 4.9E-38               | 4.0E-04 | 5.0E-01                   | 3.8E-02 | 597                 | 476 | 87  | 1.2E-37               | 1.2E-01 | 4.2E-01                   | 3.4E-02 |

|                |                   |   |   |     |     |     |         |         |          |         |      |     |     |         |         |          |         |
|----------------|-------------------|---|---|-----|-----|-----|---------|---------|----------|---------|------|-----|-----|---------|---------|----------|---------|
| 135465896      | rs6930223         | G | T | 162 | 345 | 192 | 1.1E-05 | 4.4E-01 | 1.5E-01  | 3.1E-02 | -    | -   | -   | -       | -       | -        | -       |
| 135468251      | <b>rs4895440</b>  | A | T | 358 | 293 | 53  | 4.1E-39 | 3.1E-04 | 5.0E-01  | 3.7E-02 | 590  | 471 | 84  | 1.0E-35 | 2.5E-01 | 4.1E-01  | 3.5E-02 |
| 135468266      | <b>rs4895441</b>  | A | G | 364 | 293 | 51  | 2.2E-38 | 2.6E-04 | 5.0E-01  | 3.8E-02 | 598  | 481 | 85  | 2.8E-36 | 9.2E-02 | 4.2E-01  | 3.5E-02 |
| 135468837      | <b>rs9376092</b>  | C | A | 351 | 300 | 52  | 2.1E-38 | 6.8E-04 | 5.0E-01  | 3.8E-02 | 597  | 485 | 90  | 3.0E-36 | 1.1E-01 | 4.1E-01  | 3.4E-02 |
| 135468852      | <b>rs9389269</b>  | T | C | 364 | 293 | 53  | 1.1E-38 | 6.4E-04 | 5.0E-01  | 3.8E-02 | 602  | 484 | 85  | 2.0E-35 | 1.2E-01 | 4.1E-01  | 3.5E-02 |
| 135469510      | <b>rs9402686</b>  | G | A | 366 | 297 | 53  | 1.7E-38 | 3.3E-04 | 5.0E-01  | 3.8E-02 | 601  | 486 | 82  | 5.1E-36 | 1.3E-01 | 4.2E-01  | 3.6E-02 |
| 135471786      | rs10484494        | G | A | 617 | 93  | 0   | 2.4E-08 | -       | 3.6E-01  | 6.4E-02 | 1009 | 146 | 8   | 4.4E-05 | 8.4E-01 | 2.2E-01  | 1.1E-01 |
| 135473333      | <b>rs11154792</b> | T | C | 382 | 282 | 47  | 1.4E-35 | 5.7E-03 | 4.9E-01  | 4.0E-02 | 644  | 450 | 69  | 3.6E-31 | 5.3E-02 | 4.1E-01  | 3.8E-02 |
| 135473754      | rs1411919         | A | G | 420 | 256 | 44  | 8.3E-12 | 2.5E-01 | -2.2E-01 | 4.3E-02 | 677  | 418 | 64  | 1.4E-15 | 4.2E-01 | -2.5E-01 | 4.1E-02 |
| 135474576      | rs7766963         | T | C | 173 | 355 | 184 | 4.3E-03 | 4.4E-01 | 1.0E-01  | 3.1E-02 | -    | -   | -   | -       | -       | -        | -       |
| 135476864      | rs2223385         | G | A | 419 | 256 | 45  | 3.9E-12 | 2.4E-01 | -2.2E-01 | 4.2E-02 | 672  | 424 | 64  | 5.2E-16 | 5.7E-01 | -2.6E-01 | 4.1E-02 |
| 135477194      | <b>rs9483788</b>  | T | C | 377 | 286 | 45  | 6.6E-29 | 1.3E-02 | 4.4E-01  | 4.1E-02 | 623  | 480 | 71  | 4.0E-24 | 1.8E-01 | 3.5E-01  | 3.8E-02 |
| <b>BLOCK 3</b> |                   |   |   |     |     |     |         |         |          |         |      |     |     |         |         |          |         |
| 135473754      | <b>rs1411919</b>  | A | G | 420 | 256 | 44  | 8.3E-12 | 2.5E-01 | -2.2E-01 | 4.3E-02 | 677  | 418 | 64  | 1.4E-15 | 4.2E-01 | -2.5E-01 | 4.1E-02 |
| 135474576      | rs7766963         | T | C | 173 | 355 | 184 | 4.3E-03 | 4.4E-01 | 1.0E-01  | 3.1E-02 | -    | -   | -   | -       | -       | -        | -       |
| 135476864      | <b>rs2223385</b>  | G | A | 419 | 256 | 45  | 3.9E-12 | 2.4E-01 | -2.2E-01 | 4.2E-02 | 672  | 424 | 64  | 5.2E-16 | 5.7E-01 | -2.6E-01 | 4.1E-02 |
| 135477194      | rs9483788         | T | C | 377 | 286 | 45  | 6.6E-29 | 1.3E-02 | 4.4E-01  | 4.1E-02 | 623  | 480 | 71  | 4.0E-24 | 1.8E-01 | 3.5E-01  | 3.8E-02 |
| 135479079      | <b>rs1320959</b>  | T | C | 417 | 252 | 41  | 2.8E-11 | 1.0E-01 | -2.0E-01 | 4.5E-02 | -    | -   | -   | -       | -       | -        | -       |
| 135480316      | rs52090910        | A | G | 608 | 93  | 2   | 1.4E-07 | 5.4E-01 | 2.4E-01  | 1.9E-01 | 1024 | 156 | 9   | 9.2E-06 | 5.8E-01 | 2.9E-01  | 1.0E-01 |
| 135480956      | rs2026937         | A | G | 175 | 330 | 195 | 1.0E-02 | 2.7E-01 | 9.0E-02  | 3.1E-02 | 261  | 610 | 296 | 2.0E-01 | 8.1E-01 | 5.0E-02  | 2.8E-02 |
| 135484218      | <b>rs9483791</b>  | T | C | 410 | 241 | 48  | 2.3E-11 | 1.8E-01 | -2.1E-01 | 4.1E-02 | 688  | 428 | 65  | 1.5E-14 | 5.1E-01 | -2.4E-01 | 4.1E-02 |
| 135484905      | <b>rs1320963</b>  | A | G | 414 | 257 | 46  | 5.3E-12 | 1.4E-01 | -2.1E-01 | 4.2E-02 | 680  | 412 | 62  | 6.3E-14 | 3.9E-01 | -2.3E-01 | 4.2E-02 |
| 135485702      | <b>rs2026938</b>  | G | A | 413 | 237 | 46  | 1.3E-10 | 2.9E-01 | -2.1E-01 | 4.2E-02 | 688  | 411 | 62  | 4.2E-14 | 4.2E-01 | -2.3E-01 | 4.1E-02 |
| 135487141      | <b>rs9376093</b>  | C | T | 410 | 240 | 48  | 6.8E-12 | 1.3E-01 | -2.1E-01 | 4.1E-02 | 690  | 425 | 65  | 1.8E-15 | 4.4E-01 | -2.5E-01 | 4.1E-02 |
| 135487507      | <b>rs9376094</b>  | T | A | 415 | 234 | 50  | 4.1E-11 | 1.9E-01 | -2.1E-01 | 4.0E-02 | 689  | 415 | 67  | 5.3E-15 | 3.5E-01 | -2.4E-01 | 4.1E-02 |
| 135488534      | rs9399139         | C | T | 210 | 326 | 158 | 1.3E-01 | 3.9E-01 | 5.6E-02  | 3.1E-02 | 337  | 602 | 231 | 5.4E-01 | 3.1E-01 | 9.8E-03  | 2.9E-02 |
| 135489466      | <b>rs9321485</b>  | T | C | 409 | 237 | 50  | 3.4E-10 | 2.2E-01 | -2.0E-01 | 4.1E-02 | 680  | 422 | 64  | 1.1E-13 | 6.5E-01 | -2.4E-01 | 4.1E-02 |
| 135489513      | <b>rs9321486</b>  | T | C | 403 | 247 | 49  | 5.2E-12 | 6.0E-02 | -2.0E-01 | 4.1E-02 | 675  | 438 | 63  | 1.5E-14 | 7.8E-01 | -2.5E-01 | 4.1E-02 |
| 135491008      | <b>rs9494149</b>  | C | T | 410 | 247 | 43  | 1.5E-10 | 1.4E-01 | -2.0E-01 | 4.3E-02 | 671  | 427 | 63  | 1.9E-14 | 5.0E-01 | -2.4E-01 | 4.1E-02 |
| 135492448      | <b>rs9376095</b>  | T | C | 408 | 232 | 50  | 2.7E-10 | 1.7E-01 | -2.0E-01 | 4.0E-02 | 684  | 421 | 58  | 3.3E-14 | 7.2E-01 | -2.7E-01 | 4.3E-02 |
| 135492890      | rs1041478         | A | G | 213 | 322 | 136 | 3.7E-01 | 6.0E-01 | 4.1E-02  | 3.3E-02 | 377  | 574 | 189 | 5.5E-01 | 2.9E-01 | 6.9E-04  | 3.0E-02 |
| 135493257      | rs6934903         | T | A | 450 | 229 | 23  | 5.2E-23 | 7.1E-03 | 5.0E-01  | 5.6E-02 | 772  | 364 | 39  | 2.0E-18 | 7.8E-01 | 3.2E-01  | 5.1E-02 |
| 135493273      | <b>rs1569534</b>  | C | T | 420 | 258 | 37  | 1.5E-11 | 2.0E-01 | -2.2E-01 | 4.5E-02 | 704  | 391 | 57  | 1.4E-13 | 1.0E+00 | -2.6E-01 | 4.3E-02 |
| 135495720      | <b>rs6929404</b>  | C | A | 413 | 238 | 42  | 5.4E-12 | 1.6E-01 | -2.2E-01 | 4.3E-02 | 701  | 391 | 56  | 1.1E-13 | 8.4E-01 | -2.6E-01 | 4.3E-02 |
| 135497022      | <b>rs9385716</b>  | A | G | 417 | 248 | 38  | 3.5E-11 | 8.8E-02 | -2.0E-01 | 4.5E-02 | 709  | 391 | 59  | 3.7E-13 | 7.2E-01 | -2.6E-01 | 4.2E-02 |
