# Supplementary material
Source: PubMed Central journal article supplement (PMC2040901)
Supplement: pnas_0611393104_11.pdf [file pnas_0611393104_11.pdf]

**Table 9.** Detailed results of association between three SNPs in the *HBS1L - MYB* intergenic region and FC trait using Measured Haplotype Analysis in European twins. Results from an additive allele substitution model (a nested model fitted within the measured haplotype analysis framework) are shown. Substitution effects are scaled as natural log(FC %). "Effect" denotes the maximum likelihood estimate (MLE) of the additive effect; s.e. denotes the standard error of this MLE.

| Block | marker    | substitution | effect   | s.e.    |
|-------|-----------|--------------|----------|---------|
| 1     | rs6904897 | T->G         | -1.1E-01 | 2.6E-02 |
| 2     | rs9399137 | T->C         | 5.3E-01  | 3.2E-02 |
| 3     | rs210962  | C->A         | -8.8E-02 | 2.3E-02 |
