# Supplementary material
Source: PubMed Central journal article supplement (PMC2040901)
Supplement: pnas_0611393104_12.pdf [file pnas_0611393104_12.pdf]

**Table 10.** Correlation of *HBS1L* and *MYB* expression for day 0 and for day 3. Upper triangle : correlation coefficients. Lower triangle : P - values for correlation.

|       |       | MYB   |         | HBS1L  |       |
|-------|-------|-------|---------|--------|-------|
|       |       | Day 0 | Day 3   | Day 0  | Day 3 |
| MYB   | Day 0 | -     | 0.01    | 0.26   | -0.14 |
|       | Day 3 | N.S   | -       | 0.49   | 0.68  |
| HBS1L | Day 0 | N.S.  | 0.003   | -      | 0.57  |
|       | Day 3 | N.S.  | <0.0001 | 0.0003 | -     |

Above diagonal = correlation  
Below diagonal = P - value
