# Supplementary material
Source: PubMed Central journal article supplement (PMC2040901)

b)

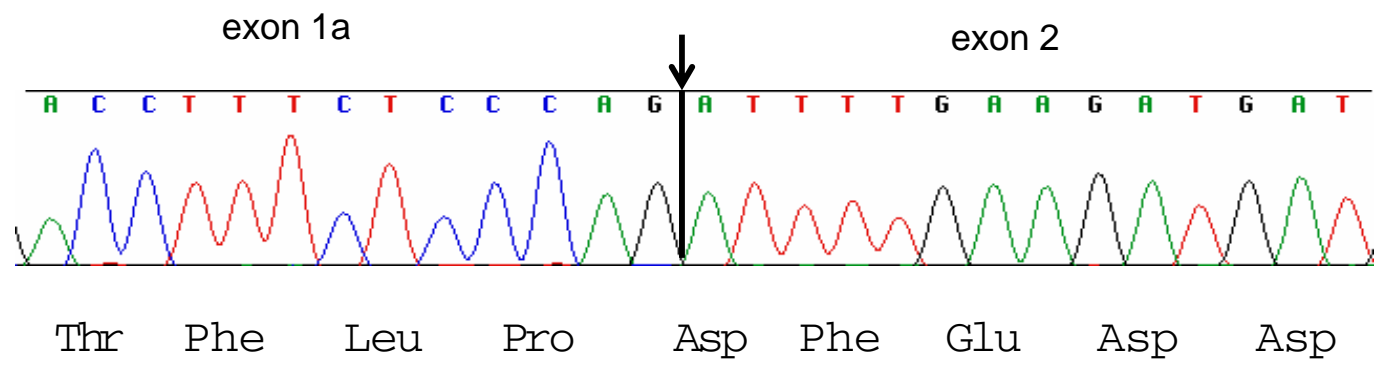

Supplement: pnas_0611393104_1.pdf [file pnas_0611393104_1.pdf]

c)

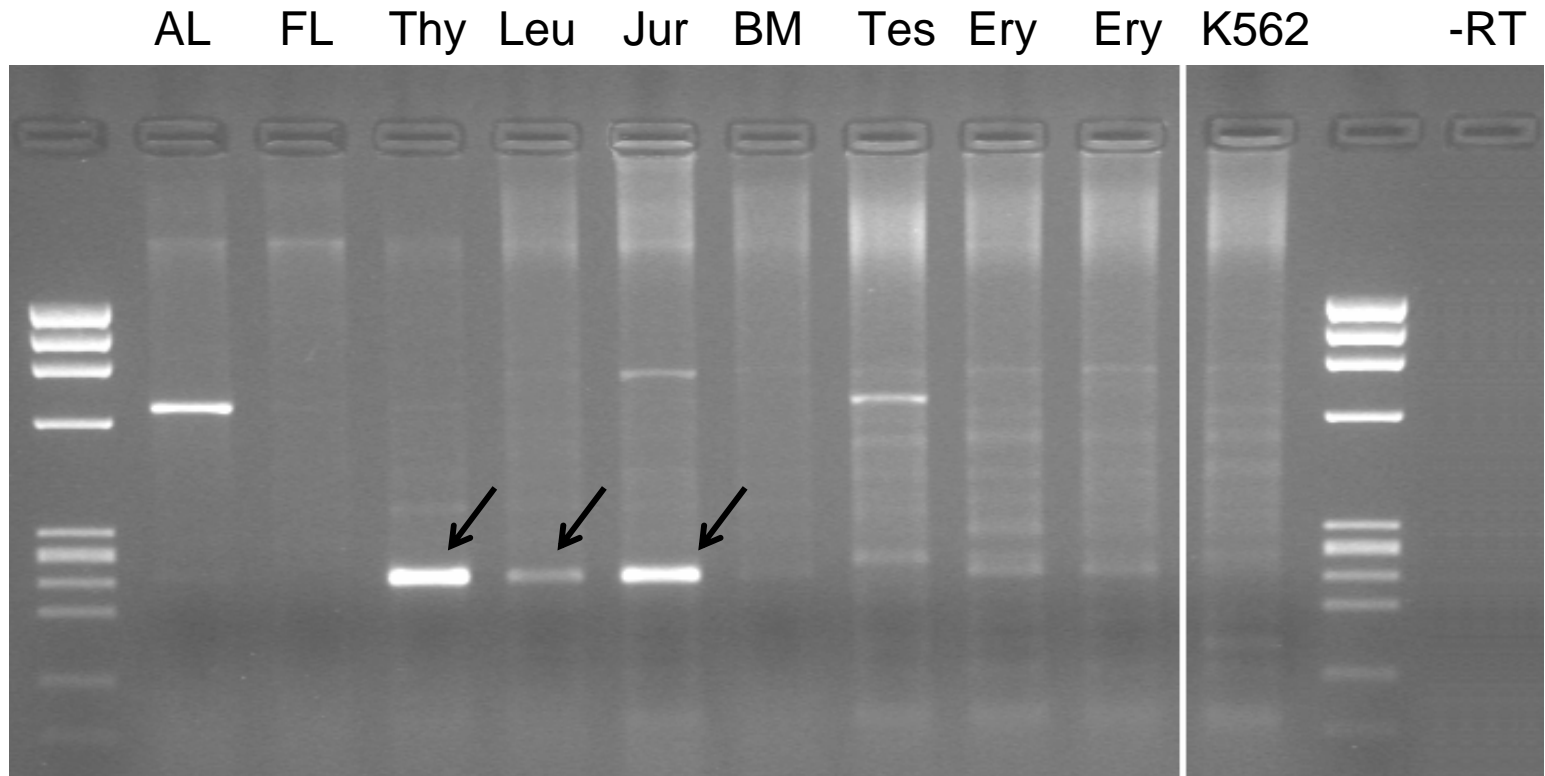

Supplement: pnas_0611393104_2.pdf [file pnas_0611393104_2.pdf]

**a**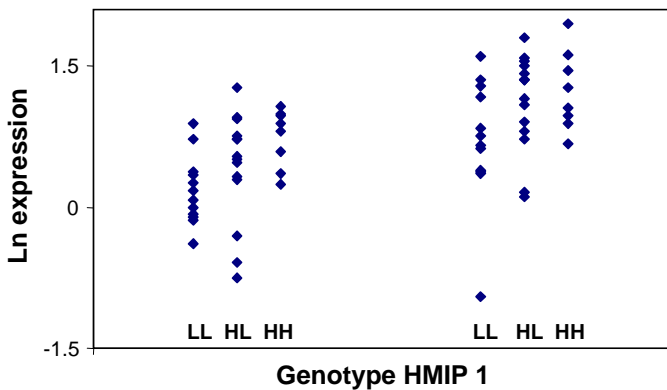**b**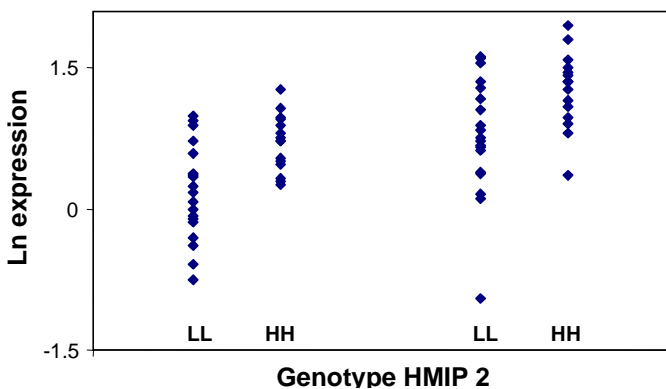**c**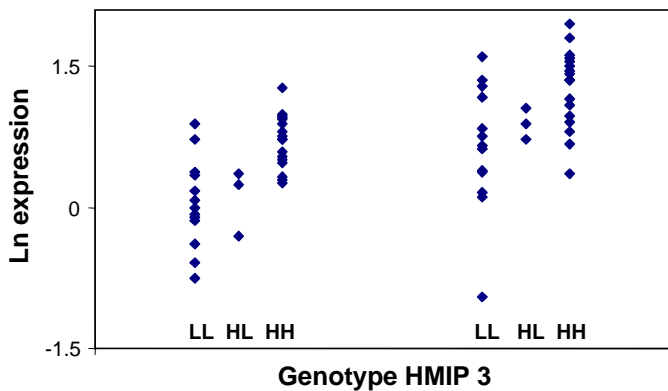

Supplement: pnas_0611393104_3.pdf [file pnas_0611393104_3.pdf]

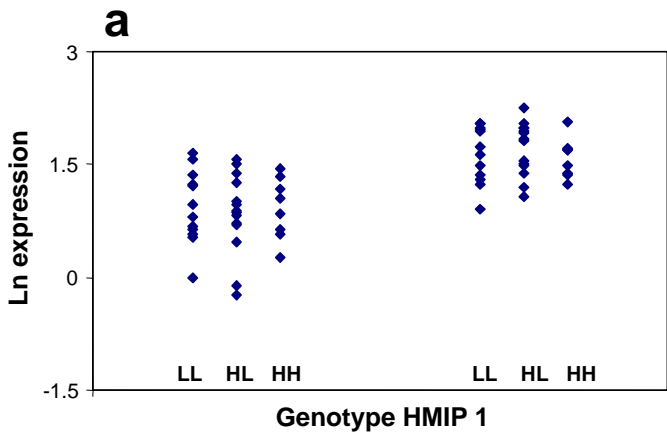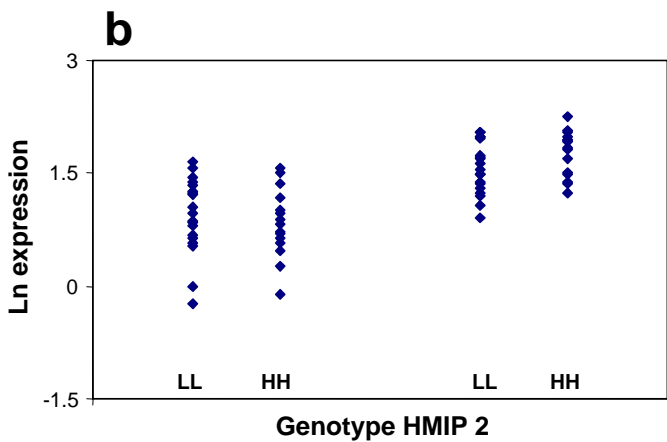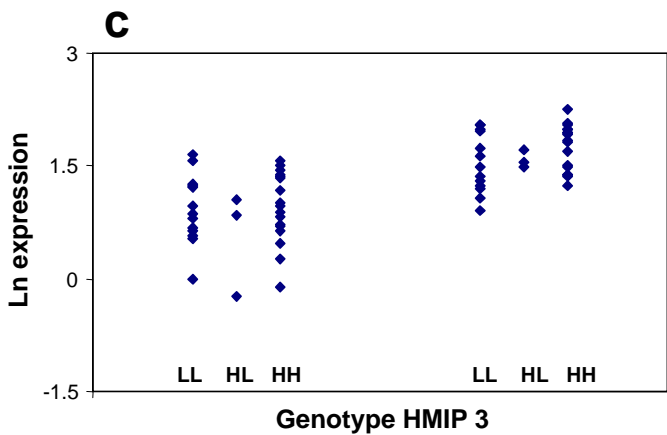

Supplement: pnas_0611393104_4.pdf [file pnas_0611393104_4.pdf]
